# Supplementary material for: Identification of Lipid Biomarkers for Chronic Joint Pain Associated with Different Joint Diseases
Source: MDPI journal article supplement (doi:10.3390/biom13020342), 2023-02-09
Supplement: s1 [file s1]

# Identification of lipid biomarkers for chronic joint pain associated with different joint diseases

Spiro Khoury *et al.*, 2023

## Supplementary Materials

Figure S1

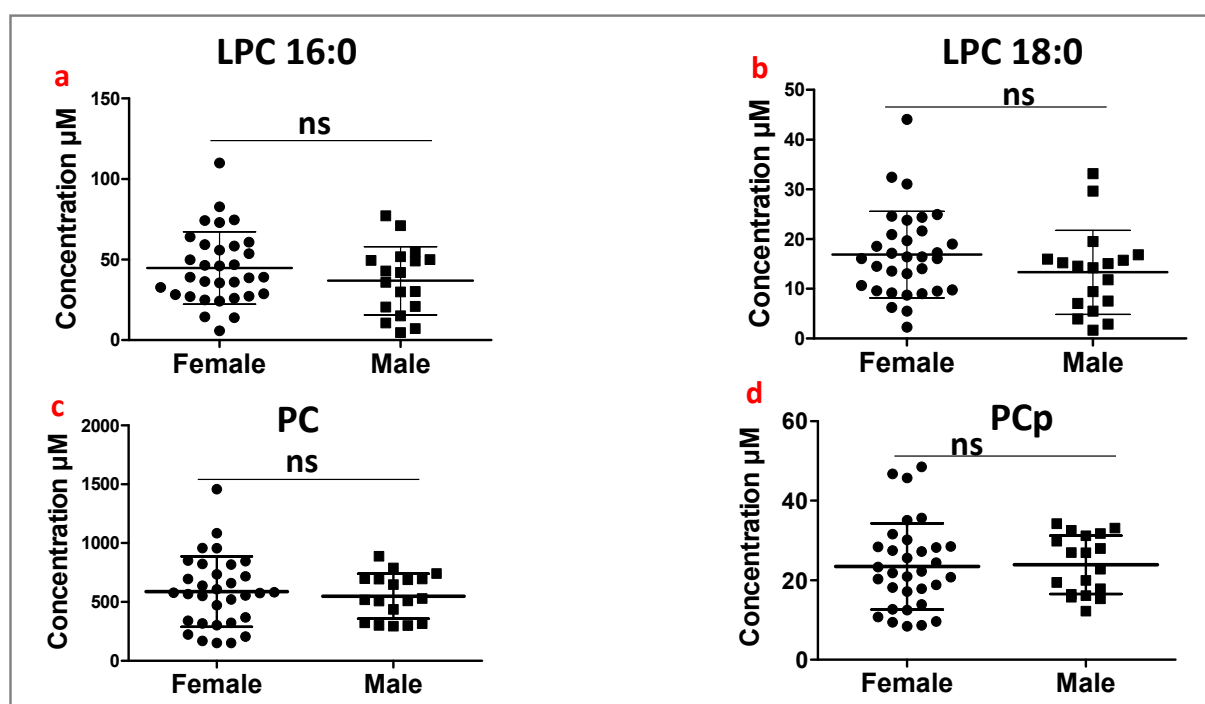

**Figure S1.** Correlation of lipid levels in the synovial fluid of patients with gender. **a**, **b**, **c** and **d** Comparisons of lipid concentrations (LPC16:0, LPC18:0, PC and PCp, respectively) between female and male showing no significant variation in lipid levels.

Figure S2

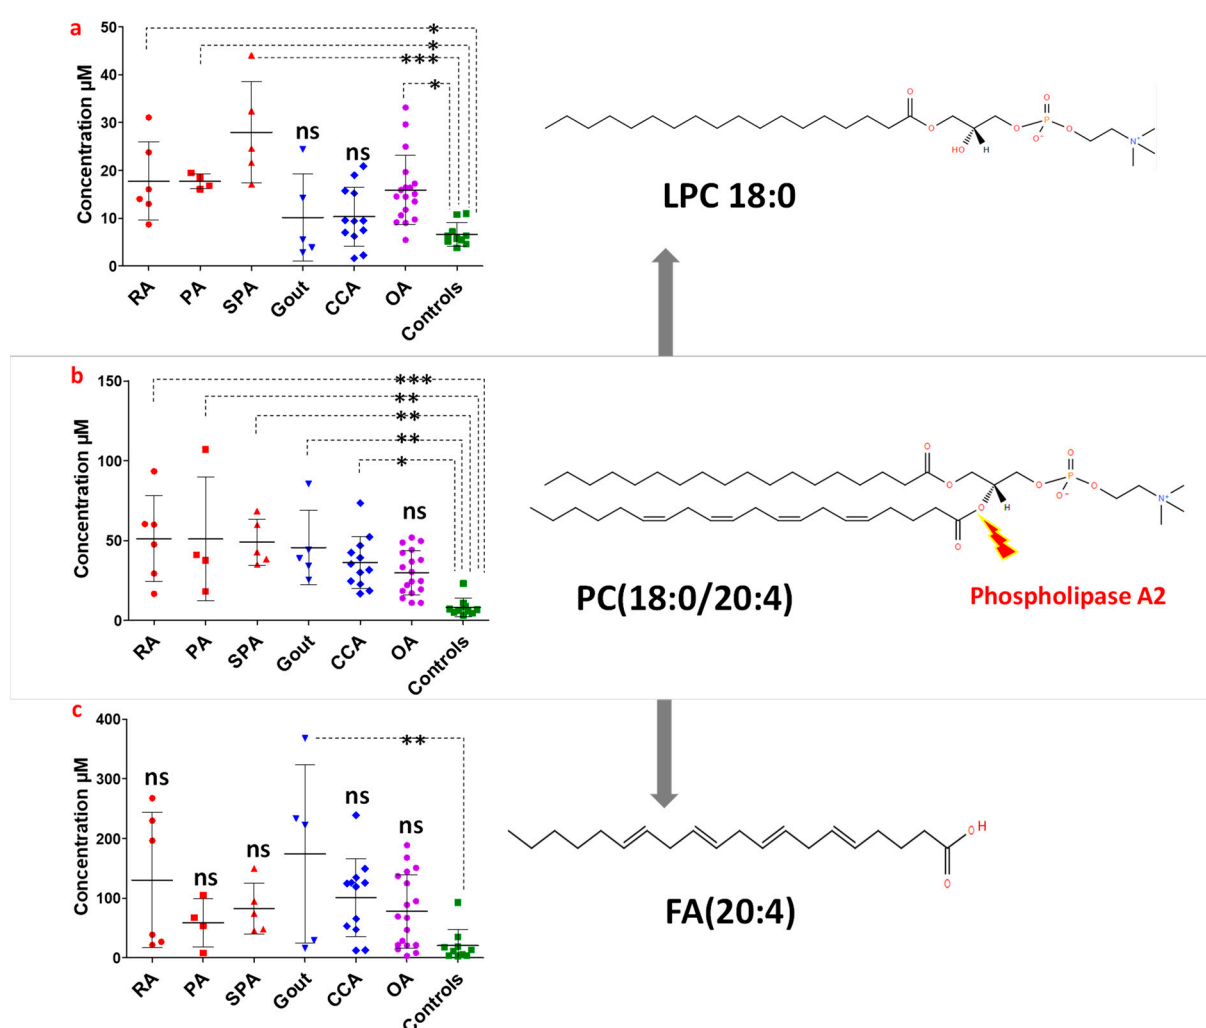

**Figure S2.** Evaluation of phospholipase A2 (PLA2) role in the variation of LPC18:0 level in the synovial fluid of patients. **a**, **b** and **c** Represent the concentration (in  $\mu\text{M}$ , left panel) and the structure (right panel) of LPC18:0, PC(18:0/20:4), FA20:4, respectively, in the different rheumatic diseases compared to controls. The comparison between lipid concentrations in the individual joint pathologies was based on the one-way analysis of variance completed with the Bonferroni's Multiple Comparison Test ns: not significant  $p > 0.05$ , \*:  $0.01 < p < 0.05$ , \*\*:  $0.001 < p < 0.01$  and \*\*\*:  $p < 0.001$ .

**Table S1**

**Table S1.** Age (year) and BMI distribution in patients according to the different joint pathologies associated with chronic joint pain. Values are expressed as average  $\pm$  SD (rheumatoid arthritis RA;  $n = 6$ , psoriatic arthritis PA;  $n = 4$ , spondyloarthritis SPA;  $n = 5$ , chondrocalcinosis CCA;  $n = 12$ , Gout;  $n = 5$ , and osteoarthritis OA;  $n = 18$ ).

| Joint Pathology | Age (Average $\pm$ SD) | BMI (Average $\pm$ SD) |
|-----------------|------------------------|------------------------|
| RA              | 54.3 $\pm$ 19          | 29.2 $\pm$ 6.5         |
| PA              | 60.8 $\pm$ 7           | 25.7 $\pm$ 3.3         |
| SPA             | 46.8 $\pm$ 8.9         | 26.5 $\pm$ 4.9         |
| CCA             | 76.3 $\pm$ 6.7         | 24.9 $\pm$ 6.2         |
| Gout            | 73.2 $\pm$ 10.1        | 25.6 $\pm$ 4.7         |
| OA              | 74.7 $\pm$ 11.1        | 30.2 $\pm$ 5.9         |

**Table S2**

**Table S2.** Optimized parameters of the Electrospray Ionization Source ESI, coupled to the SYN-APT™ G2 MS, in positive and negative ion modes allowing the detection of the different lipid classes and molecular species.

| Parameters                   | Positive ionization | Negative ionization |
|------------------------------|---------------------|---------------------|
| Capillary voltage (kV)       | 5                   | 2.5                 |
| Sampling Cone (V)            | 50                  | 70                  |
| Extraction Cone (V)          | 1.5                 | 4                   |
| Source Temperature (°C)      | 80                  | 120                 |
| Desolvation Temperature (°C) | 75                  | 150                 |
| Con Gas (L/h)                | 25                  | 100                 |
| Desolvation Gas (L/h)        | 50                  | 500                 |

**Table S3**

**Table S3.** A detailed list of lipids identified in human synovial fluids.

| Lipid species | Sum formula | Target m/z | Average measured m/z | Mass shift |
|---------------|-------------|------------|----------------------|------------|
| LPC 16:0      | C24H51NO7P  | 496.3398   | 496.3369             | 0.0028     |
| LPC 18:2      | C26H51NO7P  | 520.3398   | 520.3349             | 0.0048     |
| LPC 18:1      | C26H53NO7P  | 522.3554   | 522.3536             | 0.0018     |
| LPC 18:0      | C26H55NO7P  | 524.3711   | 524.3680             | 0.0031     |
| LPC 20:5      | C28H49NO7P  | 542.3241   | 542.3200             | 0.0042     |
| LPC 20:4      | C28H51NO7P  | 544.3398   | 544.3352             | 0.0045     |
| LPC 20:3      | C28H53NO7P  | 546.3554   | 546.3512             | 0.0042     |
| LPC 20:2      | C28H55NO7P  | 548.3711   | 548.3566             | 0.0144     |
| LPC 22:6      | C30H51NO7P  | 568.3398   | 568.3354             | 0.0043     |
| PC 32:0       | C40H81NO8P  | 734.5694   | 734.5655             | 0.0039     |
| PC 34:2       | C42H81NO8P  | 758.5694   | 758.5650             | 0.0045     |
| PC 34:1       | C42H83NO8P  | 760.5851   | 760.5801             | 0.0050     |
| PC 36:5       | C44H79NO8P  | 780.5538   | 780.5476             | 0.0062     |
| PC 36:4       | C44H81NO8P  | 782.5694   | 782.5634             | 0.0061     |
| PC 36:3       | C44H83NO8P  | 784.5851   | 784.5772             | 0.0079     |
| PC 36:2       | C44H85NO8P  | 786.6007   | 786.5960             | 0.0047     |
| PC 36:1       | C44H87NO8P  | 788.6164   | 788.6083             | 0.0081     |
| PC 38:7       | C46H79NO8P  | 804.5538   | 804.5457             | 0.0081     |
| PC 38:6       | C46H81NO8P  | 806.5694   | 806.5637             | 0.0057     |
| PC 38:5       | C46H83NO8P  | 808.5851   | 808.5786             | 0.0065     |
| PC 38:4       | C46H85NO8P  | 810.6007   | 810.5941             | 0.0067     |
| PC 38:3       | C46H87NO8P  | 812.6164   | 812.6094             | 0.0069     |
| PC 40:8       | C48H81NO8P  | 830.5694   | 830.5613             | 0.0082     |
| PC 40:7       | C48H83NO8P  | 832.5851   | 832.5774             | 0.0077     |
| PC 40:6       | C48H85NO8P  | 834.6007   | 834.5942             | 0.0065     |
| PC 40:5       | C48H87NO8P  | 836.6164   | 836.6075             | 0.0089     |
| PC(P-36:4)    | C44H81NO7P  | 766.5745   | 766.5694             | 0.0051     |
| PC(P-36:2)    | C44H85NO7P  | 770.6058   | 770.5959             | 0.0099     |
| PC(P-38:5)    | C46H83NO7P  | 792.5902   | 792.5810             | 0.0092     |

---

|            |            |          |          |        |
|------------|------------|----------|----------|--------|
| PC(P-38:4) | C46H85NO7P | 794.6058 | 794.5983 | 0.0076 |
| PC(P-38:3) | C46H87NO7P | 796.6215 | 796.6086 | 0.0129 |
| PC(P-40:6) | C48H85NO7P | 818.6058 | 818.5933 | 0.0125 |

---
